# Supplementary material for: Splicing of Receptor-Like Kinase-Encoding SNC4 and CERK1 is Regulated by Two Conserved Splicing Factors that Are Required for Plant Immunity
Source: PubMed Central journal article supplement (PMC4261838; doi:10.1093/mp/ssu103), 2014-09-29
Supplement: supp_ssu103_Supplementary_information.pdf [file supp_ssu103_Supplementary_information.pdf]

## Supplementary figure legends:

### Figure S1. Map-based cloning of *RSN1*.

(A) The positions of the mapping markers. The *rsn1* mutations are flanked between markers F24M12 and T5P19.

(B) Gene structure of *RSN1* and the mutation sites in *RSN1*. Exons are indicated with gray boxes and introns with lines. Arrows indicates the mutation sites of *rsn1* mutants.

**Figure S2. Alignment of RSN2 and its homologs from other eukaryotes.** Amino acid sequences of hSPF45 from human, SPF45 from *Drosophila*, F58B3.7 from *C.elegans*, OsDRT111 from rice and RSN2 were aligned with Clustal Omega program (<http://www.ebi.ac.uk/Tools/msa/clustalo/>) and the alignment result was shaded with BOXSHADE program ([http://www.ch.embnet.org/software/BOX\\_form.html](http://www.ch.embnet.org/software/BOX_form.html)).

**Figure S3. flg22-induced ROS burst in wild type and *rsn2-1* plants.** Four-week-old soil-grown plants were used in this assay.

**Supplementary Table S1. Primers used in this study.**

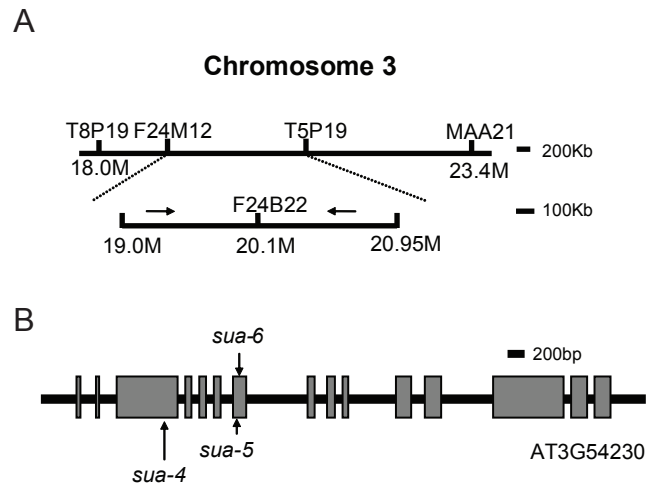

Figure S1. Map-based cloning of *RSN1*.

```

F58B3.7 1 ----MYNDEDDVPQGPPAAKQAKPMHNIQMAFMQSQLAQRKAALQQAARQLVKSSAP
RSN2 1 MLGGLYGDLPPPTDDEKPSGNS--SSVWSSSTKMAPPTLRKPPAF-AP-----
OSDRT111 1 MLGGLYGDLPPPSSSADDDKPS-AAGWSSAAKMAPPTLRKPPATFAP-----
hSPF45 1 --MSLYDDLGVETSD-----SK-TEGWSKNFKLLQSQLQVKKAALTQAK-SQRTKQSTVL
SPF45 1 --MDLYDGIDTRARS-----SQ-IDGWSSGIKMLQTQLAVKMAVK-----PLM

F58B3.7 57 PVIDLSTRNRTITTAVTSKSFQIPIRANPVSDNISFLPKAATDESVMLFGEEHVKCEYYP
RSN2 46 -PQTILRPLNKPKPIVSAPYKPPPSNSSQSVLIPANESAPSHQPALVGVTSSVIEEYDP
OSDRT111 47 -PPSVLRN-SRPAPKAPAAQPPPPTL-----PIETTTSTSFQPALVAVQSTVMEEYDP
hSPF45 52 APVIDLKRGGSSDDRQIV-DT-PPHVAAGLKDPVPSGFSAG-----EVLIPLADEYDP
SPF45 42 TPVNLRSKRLADPEVTC-FA-P--ITTVVSKPLISGKALPSILERINRGDWDVADEYDP

F58B3.7 117 MTPNNYEVWAKEINDRKQREKTAREVAKRLQR-----EHEEEDDKKRS-----
RSN2 105 ARPNDYEEYKREKKRKATEAEMKREMDKRRQEDEERDKREREEREKERERDNSDPSR---
OSDRT111 99 ARPNDYEDYRKDKLKRAKEAEVRKELERRRRREEEERERE-REL-----REREGRDA---
hSPF45 103 MFPNDYEKVVKRQREE---RQRQRELER-----QKEIEEREKRRK-DR-----
SPF45 98 QRPNEYEKLKEKSNGS---DKNRAGVSD-----REDRDDKEKDRKRGRVRGREFYR

F58B3.7 159 -----KGA-----AIAPPTMLMEPEPEV
RSN2 162 -----LNISGE-----EA-W--KRRAAMSGGSGGKRSSSPPGNVDGFSI--
OSDRT111 149 -----LNISGE-----EA-W--KRRAAMSGSAA---PRPSSSPHGDFAI--
hSPF45 142 -----HEASGFARRPDPDSDEDEDEYERRRKRSMGGAA-----IAPPTSLVEKDKEL
SPF45 146 DEVSAPNLKISGFGHRQND---DDMYLPSPGLVAKQGGAT-----IAPPPSLQEMST--

F58B3.7 177 IKNTNENQDEKPH----SSFMPPPSFL-----PAFGKATSRGLGIAANIMKR
RSN2 200 -----GKSETSGLGVGAGGQMTAAQRMMAK
OSDRT111 184 -----GNSSSSGLGLGAGGQMTAAQRMMAR
hSPF45 189 PRDFPYEDSRPRSQSSKAAIPPPVYEEQDRPRSPTGPSNSF---LANMGGTVAHKIMQK
SPF45 195 -----DS--GCEATNT---MPYSASSVAAKIMAK

F58B3.7 220 HGYKEGAGLGKSEQGMSTALSIEKTGVRGGNIVAEAPKAP-T-----
RSN2 225 MGWKQGQGLGKSEQGITTPLMAKKTDRRAGVIVNASENKSS-----
OSDRT111 209 MGWKEGQGLGKQEQGITAPLVAKKTDRRGGVIVDENS-----
hSPF45 246 YGFFEGQGLGKHEQLSTALSVEKTSKRGGKIIVGDATEK-----
SPF45 219 YGFKQGQGLGKSEQGMAIALQVEKTSKRGGRIIHEKDVFLPPLALSPPSIGSQIGTSPSH

F58B3.7 261 -----FATNSMEAVQNATKILQLWNITDLSEVSGEEGKEFADEIKEE
RSN2 267 -----AEKKVVKSVNINGEPTRVLLLRNMVGPGQV-----DDELEDEVGGE
OSDRT111 247 -----KQEKKPKSVNFDGPPTRVLLLRNMVGPGEV-----DDELEEEVASE
hSPF45 286 -----DASKKSDSNPLTEILKCPTKVVLLRNMVGAGEV-----DEDLEVETKEE
SPF45 279 KAMPPPQMVDTAAESGDIGYSITEIMKSPSKVVLLRNMVGPGDV-----DEELEPEVKDE

F58B3.7 304 ME-KCQVVNVIVHVDE--SQEEDRQVRVFVEFTNNAQAIKAFVMMNGRFFGGRSVSAGF
RSN2 308 CG-KYGTVTRVLIFEITEPNFVHEAVRIFVQFSRPETTKALVDLDGRYFGGRTVRATF
OSDRT111 288 CS-KYGTVLRVLIFEITQADFPAEAVRIFILFERAEEATKAMIDLEGRFFGGRVVRATF
hSPF45 330 CE-KYGKVGKCVIFEIP--GAPDDEAVRIFLEFERVESAIKAVVDLNGRYFGGRVVKACF
SPF45 334 CNTKYGEVNSVIIHESF--GTVPEDAVKIFVEFRRIESAIKAVVDLNGRFFGGRQVRAGF

F58B3.7 361 QNVSDYNNREF-----
RSN2 367 YDEEKFSKNELAPVPGEIPGY-
OSDRT111 347 FDEERFGKNQLAPMPGEVAGFD
hSPF45 387 YNLDKFRVLDLAEQV-----
SPF45 392 YNYDKFKCFQLH-----

```

Figure S2. Alignment of RSN2 and its homologs from other eukaryotes.

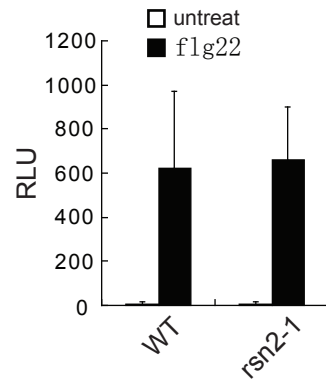

Figure S3. flg22-induced ROS burst in wild type and *rsn2-1* plants.

**Table S1. Primers used in this study**

| Primer                | 5'-3' sequence                 | Purpose              |
|-----------------------|--------------------------------|----------------------|
| <i>SNC4</i> -RT-F     | cttcgcagatgaaactgttg           | Real-time PCR        |
| <i>SNC4</i> -RT-R     | gtggaataagagccttcagc           | Real-time PCR        |
| <i>CERK1</i> -RT-F    | gcacaatttcagctacag             | Real-time PCR        |
| <i>CERK1</i> -RT-R    | caacaagccacaatcactcc           | Real-time PCR        |
| <i>CERK1</i> -SPL-1R  | ggtgcattccaccattc              | Alternative splicing |
| <i>AtSR1/SRp34</i> -F | aggagcagaagtccaaggc            | Alternative splicing |
| <i>AtSR1/SRp34</i> -R | ccttctgaacagaaggtagag          | Alternative splicing |
| <i>UI-70K</i> -F      | cccaataatgatccaatgc            | Alternative splicing |
| <i>UI-70K</i> -R      | cttatatgcagctttcatgtc          | Alternative splicing |
| <i>RSN1</i> -F        | gagcgggtaccaccaccatcatcccag    | Complementation      |
| <i>RSN1</i> -R        | cgcggggatccatagccaggattccactgc | Complementation      |
| F17F8-F1              | ggaagaggattgactcaagagc         | InDel marker         |
| F17F8-R1              | gcagcaaacacgtacgtgagc          | InDel marker         |
| F1K23-F               | gcaaatccataggaagtgagtc         | InDel marker         |
| F1K23-R               | gatctgtatctgaaacctgggaa        | InDel marker         |
| F13K9-F               | ttctgctgaaccaaggtgc            | InDel marker         |
| F13K9-R               | ataatatgatgcgcgctagg           | InDel marker         |
| F14M2-F               | cgcatacgtgtcaccgtgag           | InDel marker         |
| F14M2-R               | tgtccgggactgcctttagc           | InDel marker         |
| T8P19-F1              | agaacacgcaaaaggacacg           | InDel marker         |
| T8P19-R1              | gcttagtataactggttttgg          | InDel marker         |
| F24M12-F1             | tgaagattctacctcgcgtg           | InDel marker         |
| F24M12-R1             | gttgatctggtgaccaatcc           | InDel marker         |
| T5P19-F1              | cgtattaaaagtttgagatgttac       | InDel marker         |
| T5P19-R1              | aatagactgcaaaggtttttgac        | InDel marker         |
| MAA21-F1              | gtcacccatgatgcaaagg            | InDel marker         |
| MAA21-R1              | gcaattgaagcagactcaacc          | InDel marker         |
| F24B22-F1             | gtgttgatgtatgcctgagc           | InDel marker         |
| F24B22-R1             | cctaaagtacaatccaagagc          | InDel marker         |
